# Supplementary material for: Security use of the chiral photonic film made of helical liquid crystal structures
Source: Royal Society of Chemistry journal article supplement (doi:10.1039/d0nr03743e), 2020-01-01
Supplement: d0nr03743e1.pdf [file d0nr03743e1.pdf]

## Supporting Information

# Security use of chiral photonic film made of helical liquid crystal structures

Wongi Park,<sup>a</sup> Taewoo Ha,<sup>bc</sup> Taek Sun Jung,<sup>d</sup> Kyung Ik Sim,<sup>d</sup> Jae Hoon Kim,<sup>d</sup> Joanna M. Wolska,<sup>e</sup> Damian Pocięcha,<sup>e</sup> Ewa Gorecka,<sup>e</sup> Teun-Teun Kim,<sup>\*bc</sup> and Dong Ki Yoon<sup>\*af</sup>

\*To whom correspondence should be addressed.

E-mail: [nandk@kaist.ac.kr](mailto:nandk@kaist.ac.kr) and [teun2000@gmail.com](mailto:teun2000@gmail.com)

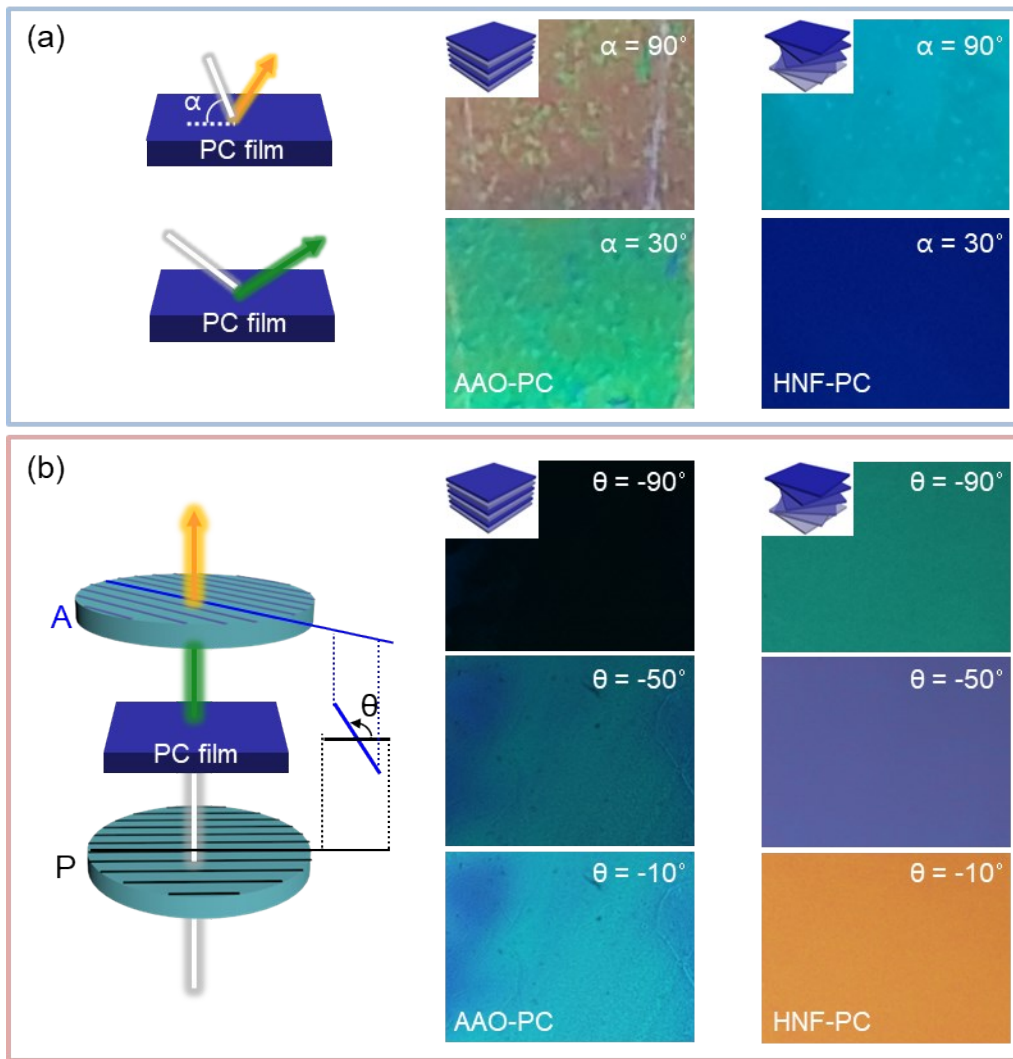

**Fig. S1.** (a) Viewing angle-dependent color changes of AAO-PC (non-chiral) and HNF-PC (chiral) in reflection mode. Both of the samples show viewing angle-dependent color change. (b) Polarization-dependent color changes of both PCs when polarizer rotates. Only the chiral sample shows the polarization-dependent color variations. Non-chiral film shows the brightness changes.

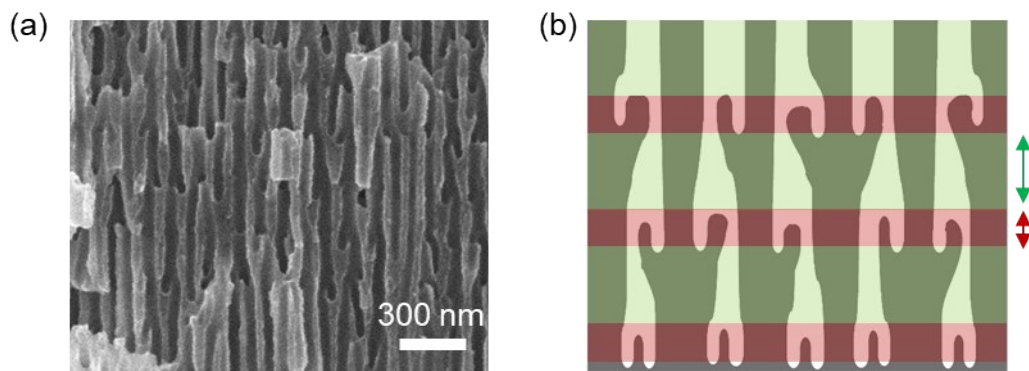

**Fig. S2.** (a) Cross-sectional SEM image of branched AAO film and (b) its schematic illustration. Pseudo layers with high and low air porosity are marked as red and green, respectively.

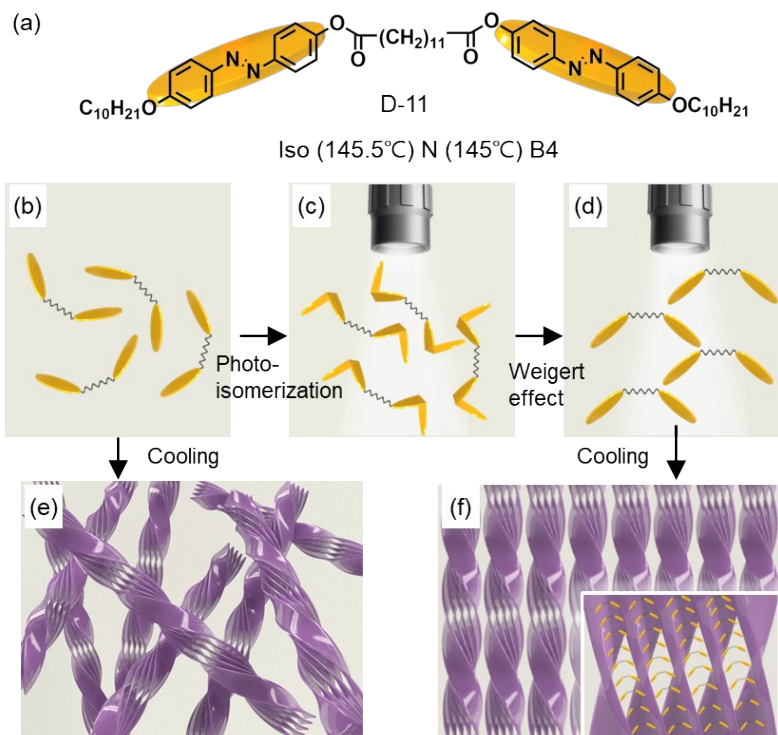

**Fig. S3.** Experimental procedure for fabricating aligned HNF film. (a) Chemical structure of D-11. (b-d) Schematic illustration of photoalignment process of D-11 molecules under shining of UV light. HNFs are randomly or uniaxially aligned under (e) without UV or (f) UV condition.

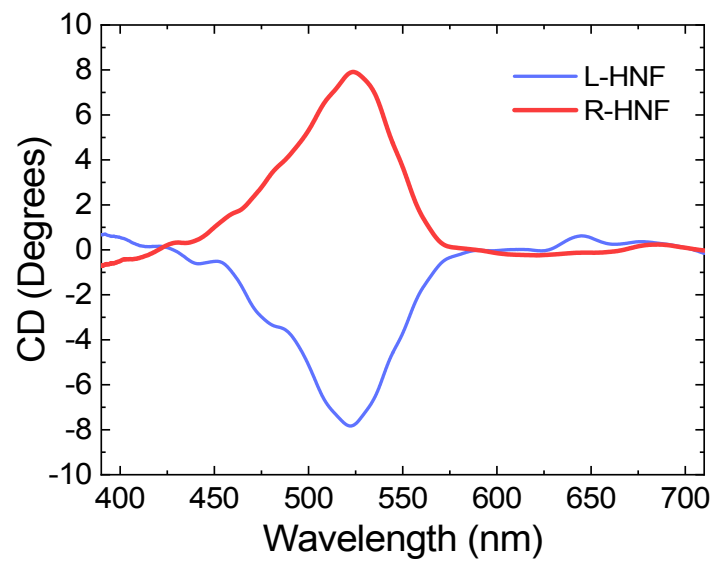

**Fig. S4.** CD results of HNF-PC film.

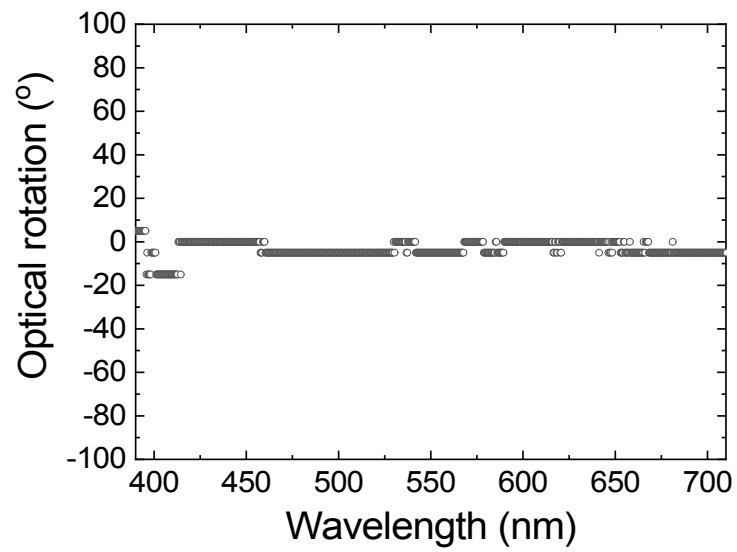

**Fig. S5.** Wavelength dependent optical rotation in AAO-PC film.
